# Supplementary material for: Exploring patient treatment decision making for osteoarthritis in the UAE: a cross-sectional adaptive choice-based conjoint study
Source: Springer Nature journal article supplement (doi:10.1186/s12889-023-16490-1), 2023-08-12
Supplement: MOESM1 [file 12889_2023_16490_MOESM1_ESM.pdf]

## Supplemental Material

### English Version

#### Your views on Osteoarthritis Treatment

Welcome to our survey about your preferred choice of medication for your Osteoarthritis.

We would like to thank you for taking part in this study and start by briefly describing the survey.

This survey will be asking you to complete series of questions.

1. The first set of questions will ask you general information about yourself and illness.
2. The second set will ask you to indicate your medication preferences.
3. Then the screening questions will present 4 different medications and ask you if you would consider taking them or not.
4. Then you will be asked to make choices between 3 different medications.

You might feel that the survey seems complicated to start with. However, we are hoping that when you see that the software is listening to your answers and helping you make decisions, you will enjoy the experience.

When you are selecting your answers, please consider that your choices will represent your preferred medication for your chronic illness.

We would like to assure you that all the information you provide in this survey is confidential and will only be used for the purpose of this study.

Completed surveys will be anonymous and your identity will be protected.

Username

Password

Please confirm that you are happy to take part in this study by typing your username and password and then click "Next" button to start completing the survey.

### Arabic Version

#### اختيار الدواء لمعالجة التهاب المفاصل

مرحباً، نشكر مشاركتك في هذه الدراسة، سوف نطرح عليك مجموعة من الاسئلة

1. المجموعة الأولى من الأسئلة هي معلومات عامة عنك وعن مرضك.
  2. المجموعة الثانية من الأسئلة عن مواصفات العلاج المفضل لديك.
  3. بعد ذلك سنطلبك اربع خيارات من الادوية لتختار المفضل لديك.
  4. اخيراً سنطلب منك ان تختار بين ثلاثة أنواع من الادوية.
- في البداية يمكن ان تشعر ان الاستبيان معقد و لكننا نأمل انك سوف تستمتع بذلك عندما نرى ان الاستبيان يتأقلم لاجبتك و يساعدك على اتخاذ القرارات.
- كل المعلومات في الاستبيان سرية وسوف تستخدم في البحث فقط. هوية المشارك سوف تبقى مجهولة و محمية.

ادخل الاسم المستخدم و كلمة السر و اضغط على "التالي" للبدء بتعبئة الاستبيان.

اسم المستخدم

كلمة السر

الرجاء التأكيد علي موافقتك الدخول في هذا البحث بادخال اسم المستخدم و كلمة السر ثم اضغط على التالي

التالي

**Supplemental figure 1.** An example of the first screen of the ACBC questionnaire (The first screen of the ACBC questionnaire briefly introduces the participants to the content of the questionnaire. This introductory part helps the participants to know what to expect and what kind of questions and tasks are requested from them throughout the whole ACBC questionnaire).

## Supplemental Material

### English Version

Your views on Osteoarthritis Treatment

Which category below includes your age?

☐ Under 20

☐ 20-29

☐ 30-39

☐ 40-49

☐ 50-59

☐ 60-69

☐ 70-79

☐ Over 79

0% 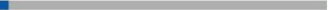 100%

### Arabic Version

اختيار الدواء لمعالجة التهاب المفاصل

الفئة العمرية

☐ أقل من 20

☐ 20-29

☐ 30-39

☐ 40-49

☐ 50-59

☐ 60-69

☐ 70-79

☐ أكثر من 79

100%  0%

**Supplemental figure 2.** An example of patients' demographics question (age).

## Supplemental Material

### English Version

---

Your views on Osteoarthritis Treatment

What is your gender?

☐ Male

☐ Female

0%  100%

### Arabic Version

---

اختيار الدواء لمعالجة التهاب المفاصل

الجنس

ذكر ☐

أنثى ☐

100%  0%

**Supplemental figure 3.** An example of patients' demographics question (gender).

Supplemental Material

English Version

Your views on Osteoarthritis Treatment

Please specify your country of origin.

☐ United Arab Emirates

☐ India

☐ Pakistan

☐ Bangladesh

☐ Philippines

☐ Iran

☐ Egypt

☐ Nepal

☐ Sri Lanka

☐ China

☐ Others:

☐ I Prefer not to say

Back

Next

Arabic Version

اختيار الدواء لمعالجة التهاب المفاصل

البلد الأم

☐ الإمارات العربية المتحدة

☐ الهند

☐ الباكستان

☐ بنغلاديش

☐ الفلبين

☐ ايران

☐ مصر

☐ نبال

☐ سريلنكا

☐ الصين

☐ بلد آخر

☐ أفضل عدم التصريح

التالي

الرجوع

100%

0%

Supplemental figure 4. An example of patients’ demographics question (country of origin).

## Supplemental Material

### English Version

Your views on Osteoarthritis Treatment

Please specify your native language.

☐ Arabic

☐ English

☐ Hindi

☐ Persian

☐ Mandarin

☐ Tamil

☐ Filipino

☐ Urdu

☐ Others:

☐ I prefer not to say

0%  100%

### Arabic Version

اختيار الدواء لمعالجة التهاب المفاصل

اللغة الأم

☐ العربية

☐ الإنجليزية

☐ الهندية

☐ الفارسية

☐ الصينية

☐ التاميلية

☐ الغالبينية

☐ الأردية

☐ لغة أخرى

☐ أفضل عدم التصريح

100%  0%

**Supplemental figure 5.** An example of patients' demographics question (native language).

## Supplemental Material

### English Version

Your views on Osteoarthritis Treatment

Please specify your educational level.

☐ Doctoral degree

☐ Master's degree

☐ Bachelor's degree

☐ Diploma

☐ High school certificate

☐ Other

☐ I prefer not to say

0%  100%

### Arabic Version

اختيار الدواء لمعالجة التهاب المفاصل

المستوى العلمي

☐ الدكتوراة

☐ الماجستير

☐ البكالوريوس

☐ الدبلوم

☐ شهادة الثانوية العامة

☐ درجة أخرى

☐ أفضل عدم التصريح

100%  0%

**Supplemental figure 6.** An example of patients' demographics question (education).

## Supplemental Material

### English Version

Your views on Osteoarthritis Treatment

Employment questions.

☐ Employed

☐ Employed part-time

☐ Self-employed

☐ Unemployed

☐ Under-employed (My wage is below the industry standard)

☐ Retired

☐ Student

☐ I prefer not to say

Back Next

0% 100%

### Arabic Version

اختيار الدواء لمعالجة التهاب المفاصل

العمل

☐ موظف بدوام كامل

☐ موظف بدوام جزئي

☐ عامل لحسابك الخاص

☐ عاطل عن العمل

☐ تحت مستوى العمالة (أجري أقل من المعيار الصناعي)

☐ متقاعد

☐ تلميذ/طالب

☐ أفضل عدم التصريح

التالي الرجوع

100% 0%

**Supplemental figure 7.** An example of patients' demographics question (employment).

## Supplemental Material

### English Version

---

Your views on Osteoarthritis Treatment

How many years have you been suffering from osteoarthritis?

☐ Less than 5 years

☐ 5-10 years

☐ More than 10 years

☐ I do not know

0%  100%

### Arabic Version

---

اختيار الدواء لمعالجة التهاب المفاصل

كم المدة التي تعاني فيها من التهاب المفاصل

☐ أقل من 5 سنوات

☐ 5 إلى 10 سنوات

☐ أكثر من 10 سنوات

☐ لا أعلم

100%  0%

**Supplemental figure 8.** An example of OA medical history question (duration of OA).

## Supplemental Material

### English Version

---

Your views on Osteoarthritis Treatment

How much did pain interfere with normal life?

☐ Not at all

☐ A little bit

☐ Moderately

☐ Quite a bit

☐ Extremely

0%  100%

### Arabic Version

---

اختيار الدواء لمعالجة التهاب المفاصل

مقدار تأثير الألم على حياتك اليومية

☐ لا يؤثر

☐ يؤثر قليلا

☐ يؤثر باعتدال

☐ يؤثر شيناً كبير

☐ يؤثر بشدة

100%  0%

**Supplemental figure 9.** An example of OA medical history question (level of pain).

## Supplemental Material

### English Version

Your views on Osteoarthritis Treatment

Affected joint (Please tick all relevant joints)

☐ Hip

☐ Knee

☐ Feet

☐ Shoulder

☐ Elbow

☐ Hand

☐ Spine (back/neck)

☐ Other joint:

0%  100%

### Arabic Version

اختيار الدواء لمعالجة التهاب المفاصل

المفصل المصاب (الرجاء وضع علامة لكل المفاصل المصابة)

☐ الورك

☐ الركبة

☐ القدم

☐ الكتف

☐ الكوع (المرفق)

☐ اليد

☐ العمود الفقري (الظهر/الرقبة)

☐ مفصل اخر

100%  0%

**Supplemental figure 10.** An example of OA medical history question (site of OA).

## Supplemental Material

### English Version

Your views on Osteoarthritis Treatment

What is your preferred treatment for Osteoarthritis?

☐ Physiotherapy and exercise

☐ Medications

☐ Joint injection

☐ Surgery

0%  100%

### Arabic Version

اختيار الدواء لمعالجة التهاب المفاصل

ما هو العلاج المفضل لديك للالتهاب المفاصل

☐ العلاج الطبيعي والتمارين

☐ الأدوية

☐ حقنة المفصل

☐ الجراحة

100%  0%

**Supplemental figure 11.** An example of OA medical history question (preferred treatment).

## Supplemental Material

### English Version

Your views on Osteoarthritis Treatment

Choose the medication you take for treatment of osteoarthritis.

|                                      |                                                    |                                                       |
|--------------------------------------|----------------------------------------------------|-------------------------------------------------------|
| <input type="checkbox"/> Paracetamol | <input type="checkbox"/> Ibuprofen                 | <input type="checkbox"/> Fentanyl                     |
| <input type="checkbox"/> Capsaicin   | <input type="checkbox"/> Meloxicam                 | <input type="checkbox"/> Morphine                     |
| <input type="checkbox"/> Glucosamine | <input type="checkbox"/> Naproxen                  | <input type="checkbox"/> Oxycodone                    |
| <input type="checkbox"/> Diclofenac  | <input type="checkbox"/> Codeine or Dihydrocodeine | <input type="checkbox"/> Others: <input type="text"/> |
| <input type="checkbox"/> Etodolac    | <input type="checkbox"/> Tramadol                  |                                                       |

0%  100%

### Arabic Version

اختيار الدواء لمعالجة التهاب المفاصل

ما هو الدواء الذي تتناوله لمعالجة التهاب المفاصل ؟

|                                                        |                                                                 |                                                      |
|--------------------------------------------------------|-----------------------------------------------------------------|------------------------------------------------------|
| <input type="checkbox"/> Fentanyl (فنتانييل)           | <input type="checkbox"/> Ibuprofen (ايبوبروفين)                 | <input type="checkbox"/> Paracetamol (الباراسيتامول) |
| <input type="checkbox"/> Morphine (مورفين)             | <input type="checkbox"/> Meloxicam (ميلوكسيكام)                 | <input type="checkbox"/> Capsaicin (الكابسيسين)      |
| <input type="checkbox"/> Oxycodone (أوكزيكودون)        | <input type="checkbox"/> Naproxen (نابروكسين)                   | <input type="checkbox"/> Glucosamine (الجلوكوزامين)  |
| <input type="checkbox"/> دواء آخر <input type="text"/> | <input type="checkbox"/> Codeine أم (كودينين) (ديهيدرو كودينين) | <input type="checkbox"/> Diclofenac (ديكلوفيناك)     |
|                                                        | <input type="checkbox"/> Tramadol (ترامادول)                    | <input type="checkbox"/> Etodolac (ايتودولاك)        |

100%  0%

Supplemental figure 12. An example of OA medical history question (current treatment).

## Supplemental Material

### English Version

#### Your views on Osteoarthritis Treatment

Please think about the medication you would most like to take for your Osteoarthritis. For each feature, select your preferred level.

| Feature                                        | Select Feature                                                                                                                                                                                                                                                        |
|------------------------------------------------|-----------------------------------------------------------------------------------------------------------------------------------------------------------------------------------------------------------------------------------------------------------------------|
| Availability                                   | <input type="radio"/> Prescription drug<br><input type="radio"/> Over-the-counter drug<br><input type="radio"/> Internet purchase drug                                                                                                                                |
| Way of taking the medicine                     | <input type="radio"/> Cream/Gel<br><input type="radio"/> Oral                                                                                                                                                                                                         |
| Frequency                                      | <input type="radio"/> Once a day<br><input type="radio"/> Twice a day<br><input type="radio"/> 3-4 times a day<br><input type="radio"/> As needed                                                                                                                     |
| How much you would expect mobility improvement | <input type="radio"/> Expect 25% mobility improvement<br><input type="radio"/> Expect 50% mobility improvement<br><input type="radio"/> Expect 75% mobility improvement                                                                                               |
| How much you would expect pain reduction       | <input type="radio"/> Expect 25% pain reduction<br><input type="radio"/> Expect 50% pain reduction<br><input type="radio"/> Expect 75% pain reduction                                                                                                                 |
| Risk of gastric ulcer                          | <input type="radio"/> No risk of gastric ulcer<br><input type="radio"/> Low risk of gastric ulcer<br><input type="radio"/> Moderate risk of gastric ulcer<br><input type="radio"/> High risk of gastric ulcer                                                         |
| Risk of addiction                              | <input type="radio"/> No risk of addiction<br><input type="radio"/> Low risk of addiction<br><input type="radio"/> Moderate risk of addiction<br><input type="radio"/> High risk of addiction                                                                         |
| Risk of kidney and liver impairment            | <input type="radio"/> No risk of kidney and liver impairment<br><input type="radio"/> Low risk of kidney and liver impairment<br><input type="radio"/> Moderate risk of kidney and liver impairment<br><input type="radio"/> High risk of kidney and liver impairment |
| Risk of heart attacks and strokes              | <input type="radio"/> No risk of heart attacks and strokes<br><input type="radio"/> Low risk of heart attacks and strokes<br><input type="radio"/> Moderate risk of heart attacks and strokes<br><input type="radio"/> High risk of heart attacks and strokes         |
| Cost                                           | <input type="radio"/> Fully covered by the insurance<br><input type="radio"/> Partially covered by the insurance<br><input type="radio"/> Not covered by the insurance                                                                                                |

Back

Next

## Supplemental Material

### Arabic Version

#### اختيار الدواء لمعالجة التهاب المفاصل

نرجو ان تفكر في مواصفات الدواء ذو الاحتمالية الاكبر لتتناوله لالتهاب المفاصل. اختر اجابه واحده لكل من المواصفات

| الميزة                            | حدد الميزة                                                                                                                                                                                                                                                                           |
|-----------------------------------|--------------------------------------------------------------------------------------------------------------------------------------------------------------------------------------------------------------------------------------------------------------------------------------|
| توفر الدواء                       | <input type="radio"/> بوصفة طبية<br><input type="radio"/> بدون وصفة طبية<br><input type="radio"/> يباع من الانترنت                                                                                                                                                                   |
| طريقة استخدام الدواء              | <input type="radio"/> كريم او هلام<br><input type="radio"/> عن طريق الفم                                                                                                                                                                                                             |
| وتيرة الاستخدام                   | <input type="radio"/> مرة في اليوم<br><input type="radio"/> مرتين في اليوم<br><input type="radio"/> 3-4 مرات في اليوم<br><input type="radio"/> عند الحاجة فقط                                                                                                                        |
| نسبة تحسن الحركة الجسدية المتوقعة | <input type="radio"/> 25% تحسن في الحركة الجسدية<br><input type="radio"/> 50% تحسن في الحركة الجسدية<br><input type="radio"/> 75% تحسن في الحركة الجسدية                                                                                                                             |
| نسبة تخفيف الألم المتوقعة         | <input type="radio"/> 25% انخفاض في الألم<br><input type="radio"/> 50% انخفاض في الألم<br><input type="radio"/> 75% انخفاض في الألم                                                                                                                                                  |
| خطر قرحة المعدة                   | <input type="radio"/> لا يوجد خطر الإصابة بقرحة المعدة<br><input type="radio"/> خطر ضئيل بالإصابة بقرحة المعدة<br><input type="radio"/> خطر متوسط بالإصابة بقرحة المعدة<br><input type="radio"/> خطر مرتفع بالإصابة بقرحة المعدة                                                     |
| خطر الادمان                       | <input type="radio"/> لا يوجد خطر الإدمان<br><input type="radio"/> خطر ضئيل للإدمان<br><input type="radio"/> خطر متوسط للإدمان<br><input type="radio"/> خطر مرتفع للإدمان                                                                                                            |
| خطر تلف الكلى والكبد              | <input type="radio"/> لا يوجد خطر تلف الكلى و الكبد<br><input type="radio"/> خطر ضئيل لتلف الكلى و الكبد<br><input type="radio"/> خطر متوسط لتلف الكلى و الكبد<br><input type="radio"/> خطر مرتفع لتلف الكلى و الكبد                                                                 |
| خطر نوبة قلبية وسكتة دماغية       | <input type="radio"/> لا يوجد خطر الإصابة بنوبة قلبية و سكتة دماغية<br><input type="radio"/> خطر ضئيل بالإصابة بنوبة قلبية و سكتة دماغية<br><input type="radio"/> خطر متوسط بالإصابة بنوبة قلبية و سكتة دماغية<br><input type="radio"/> خطر مرتفع بالإصابة بنوبة قلبية و سكتة دماغية |
| التكلفة المادية                   | <input type="radio"/> تغطية كاملة من جهة التأمين<br><input type="radio"/> تغطية جزئية من جهة التأمين<br><input type="radio"/> لا يوجد تغطية من جهة التأمين                                                                                                                           |

التالي

الرجوع

100% 0%

**Supplemental figure 13.** An example of the Build Your Own (BYO) questions (In the BYO section, participants can choose their preferred treatment characteristics through the listed attributes and their levels).

## Supplemental Material

### English Version

#### Your views on Osteoarthritis Treatment

Here, each vertical column represents a medication. For **EACH ONE**, please indicate if you would consider taking this medication or not by ticking the relevant box at the bottom of the column. (2 of 8)

|                                                                                |                                                                                |                                                                                |                                                                                |
|--------------------------------------------------------------------------------|--------------------------------------------------------------------------------|--------------------------------------------------------------------------------|--------------------------------------------------------------------------------|
| Prescription drug                                                              | Prescription drug                                                              | Prescription drug                                                              | Internet purchase drug                                                         |
| Cream/Gel                                                                      | Cream/Gel                                                                      | Oral                                                                           | Oral                                                                           |
| Once a day                                                                     | Once a day                                                                     | 3-4 times a day                                                                | Once a day                                                                     |
| Expect 50% mobility improvement                                                | Expect 25% mobility improvement                                                | Expect 25% mobility improvement                                                | Expect 25% mobility improvement                                                |
| Expect 25% pain reduction                                                      | Expect 50% pain reduction                                                      | Expect 25% pain reduction                                                      | Expect 25% pain reduction                                                      |
| No risk of gastric ulcer                                                       | High risk of gastric ulcer                                                     | No risk of gastric ulcer                                                       | No risk of gastric ulcer                                                       |
| Moderate risk of addiction                                                     | No risk of addiction                                                           | Low risk of addiction                                                          | No risk of addiction                                                           |
| Low risk of kidney and liver impairment                                        | No risk of kidney and liver impairment                                         | No risk of kidney and liver impairment                                         | Low risk of kidney and liver impairment                                        |
| No risk of heart attacks and strokes                                           | Moderate risk of heart attacks and strokes                                     | Low risk of heart attacks and strokes                                          | No risk of heart attacks and strokes                                           |
| Partially covered by the insurance                                             | Fully covered by the insurance                                                 | Fully covered by the insurance                                                 | Fully covered by the insurance                                                 |
| <input type="radio"/> A possibility<br><input type="radio"/> Won't work for me | <input type="radio"/> A possibility<br><input type="radio"/> Won't work for me | <input type="radio"/> A possibility<br><input type="radio"/> Won't work for me | <input type="radio"/> A possibility<br><input type="radio"/> Won't work for me |

Back

Next

### Arabic Version

#### اختيار الدواء لمعالجة التهاب المفاصل

كل عمود يمثل مواصفات دواء. نرجو ان تختار اذا كنت ستوافق في تناول هذا الدواء أم لا

(1 من 8)

|                                                                             |                                                                             |                                                                             |                                                                             |
|-----------------------------------------------------------------------------|-----------------------------------------------------------------------------|-----------------------------------------------------------------------------|-----------------------------------------------------------------------------|
| بدون وصفة طبية                                                              | بوصفة طبية                                                                  | بوصفة طبية                                                                  | بدون وصفة طبية                                                              |
| عن طريق الفم                                                                | كريم او هلام                                                                | كريم او هلام                                                                | كريم او هلام                                                                |
| عند الحاجة فقط                                                              | مرة في اليوم                                                                | مرة في اليوم                                                                | 3-4 مرات في اليوم                                                           |
| 25% تحسن في الحركة الجسدية                                                  | 50% تحسن في الحركة الجسدية                                                  | 25% تحسن في الحركة الجسدية                                                  | 25% تحسن في الحركة الجسدية                                                  |
| 25% انخفاض في الألم                                                         | 25% انخفاض في الألم                                                         | 75% انخفاض في الألم                                                         | 25% انخفاض في الألم                                                         |
| لا يوجد خطر الإصابة بقرحة المعدة                                            | خطر ضئيل بالإصابة بقرحة المعدة                                              | خطر مرتفع بالإصابة بقرحة المعدة                                             | لا يوجد خطر الإصابة بقرحة المعدة                                            |
| لا يوجد خطر الإدمان                                                         | خطر متوسط للإدمان                                                           | لا يوجد خطر الإدمان                                                         | خطر ضئيل للإدمان                                                            |
| لا يوجد خطر تلف الكلى و الكبد                                               | لا يوجد خطر تلف الكلى و الكبد                                               | خطر مرتفع لتلف الكلى و الكبد                                                | لا يوجد خطر تلف الكلى و الكبد                                               |
| لا يوجد خطر الإصابة بنوبة قلبية و سكتة دماغية                               | لا يوجد خطر الإصابة بنوبة قلبية و سكتة دماغية                               | خطر مرتفع بالإصابة بنوبة قلبية و سكتة دماغية                                | لا يوجد خطر الإصابة بنوبة قلبية و سكتة دماغية                               |
| لا يوجد تغطية من جهة التأمين                                                | تغطية كاملة من جهة التأمين                                                  | تغطية كاملة من جهة التأمين                                                  | تغطية جزئية من جهة التأمين                                                  |
| <input type="radio"/> امكانية الاستخدام<br><input type="radio"/> لن ينفع لي | <input type="radio"/> امكانية الاستخدام<br><input type="radio"/> لن ينفع لي | <input type="radio"/> امكانية الاستخدام<br><input type="radio"/> لن ينفع لي | <input type="radio"/> امكانية الاستخدام<br><input type="radio"/> لن ينفع لي |

التالي

الرجوع

100% 0%

**Supplemental figure 14.** An example of the screening questions (The screening section presents multiple scenarios for participants. For each scenario, participants are asked to select if the offered treatment characteristics are a “Possibility” or “Not a possibility” to consider).

## Supplemental Material

### English Version

#### Your views on Osteoarthritis Treatment

We don't want to jump to conclusions, but we have noticed that you have selected medications with certain characteristics shown below. Please tick the **ONE most important feature**.

- ☐ Cream/Gel
- ☐ Prescription drug
- ☐ Expect 50% mobility improvement
- ☐ Once a day
- ☐ None of these is an absolute requirement.

Back

Next

### Arabic Version

#### اختيار الدواء لمعالجة التهاب المفاصل

لا نريد ان نقفز للنتائج و لكن لاحظنا تكرار اختيار أدوية ذات خصائص معين. نرجو ان تختار الخاصية الاهم بالنسبة لك من بين الخصائص التالية.

- ☐ خطر متوسط للإدمان
- ☐ خطر متوسط لتلف الكلى و الكبد
- ☐ كريم او هلام
- ☐ بوصفة طبية
- ☐ خطر متوسط بالإصابة بقرحة المعدة
- ☐ 50% تحسن في الحركة الجسدية
- ☐ 50% انخفاض في الألم
- ☐ مرة في اليوم

☐ لا شيء من هذه الإختيارات يعتبر مطلب مُطلق

التالي

الرجوع

100%  0%

**Supplemental figure 15.** An example of the “must have” questions (The “Must have” questions allow participants to specify the most important characteristic that needs to be always present in their treatment scenario).

## Supplemental Material

### English Version

#### Your views on Osteoarthritis Treatment

We have noticed that you have avoided medication with certain features shown below. Please tick the **ONE** feature that is **most unacceptable**.

- ☐ High risk of addiction
- ☐ Once a day
- ☐ Expect 25% mobility improvement
- ☐ Expect 25% pain reduction
- ☐ High risk of gastric ulcer
- ☐ Cream/Gel
- ☐ High risk of heart attacks and strokes
- ☐ High risk of kidney and liver impairment
- ☐ Prescription drug
  
- ☐ None of these is totally unacceptable.

Back

Next

### Arabic Version

#### اختيار الدواء لمعالجة التهاب المفاصل

لقد لاحظنا تجنبك لبعض الادوية بمواصفات معينة. نرجو ان تختار الخاصية الغير مقبولة على الاطلاق بالنسبة لك من بين الخصائص التالية.

- ☐ خطر مرتفع للإدمان
- ☐ مرة في اليوم
- ☐ 25% تحسن في الحركة الجسدية
- ☐ 25% انخفاض في الألم
- ☐ خطر مرتفع بالإصابة بقرحة المعدة
- ☐ كريم او هلام
- ☐ خطر مرتفع بالإصابة بنوبة قلبية و سكتة دماغية
- ☐ خطر مرتفع لتلف الكلى و الكبد
- ☐ بوصفة طبية
  
- ☐ لا شيء من هذا غير مقبول على الإطلاق.

التالي

الرجوع

100%  0%

**Supplemental figure 16.** An example of the “Unacceptable” questions (The “Unacceptable” questions allow participants to specify the least important characteristic which is not considered if present in their treatment scenario).

## Supplemental Material

### English Version

#### Your views on Osteoarthritis Treatment

Here again, each vertical column represents a medication. Among these three, please decide which **ONE** is the best option for you? (Features that are same for each medication are highlighted in grey, so you can focus on the features that are different.) (1 of 5)

| Prescription drug<br>Cream/Gel          | Prescription drug<br>Cream/Gel         | Prescription drug<br>Cream/Gel         |
|-----------------------------------------|----------------------------------------|----------------------------------------|
| Once a day                              | As needed                              | Once a day                             |
| Expect 25% mobility improvement         | Expect 25% mobility improvement        | Expect 25% mobility improvement        |
| Expect 25% pain reduction               | Expect 25% pain reduction              | Expect 25% pain reduction              |
| Low risk of gastric ulcer               | No risk of gastric ulcer               | Low risk of gastric ulcer              |
| Low risk of addiction                   | No risk of addiction                   | No risk of addiction                   |
| Low risk of kidney and liver impairment | No risk of kidney and liver impairment | No risk of kidney and liver impairment |
| No risk of heart attacks and strokes    | High risk of heart attacks and strokes | No risk of heart attacks and strokes   |
| Fully covered by the insurance          | Fully covered by the insurance         | Partially covered by the insurance     |
| <input type="radio"/>                   | <input type="radio"/>                  | <input type="radio"/>                  |

Back

Next

### Arabic Version

#### اختيار الدواء لمعالجة التهاب المفاصل

هنا ايضا كل عمود يمثل مواصفات دواء. من هذه الثلاثة نرجو اختيار الدواء المفضل لديك. المواصفات المضللة هي ثابتة لكل دواء. لقد ضللناها لتسهيل عملية تركيزك على باقي المواصفات.

(5 من 1)

| بوصفة طبية<br>كريم او هلام                    | بوصفة طبية<br>كريم او هلام                   | بوصفة طبية<br>كريم او هلام                    |
|-----------------------------------------------|----------------------------------------------|-----------------------------------------------|
| مرة في اليوم                                  | عند الحاجة فقط                               | مرة في اليوم                                  |
| 25% تحسن في الحركة الجسدية                    | 25% تحسن في الحركة الجسدية                   | 25% تحسن في الحركة الجسدية                    |
| 25% انخفاض في الألم                           | 25% انخفاض في الألم                          | 25% انخفاض في الألم                           |
| خطر ضئيل بالإصابة بقرحة المعدة                | لا يوجد خطر الإصابة بقرحة المعدة             | خطر ضئيل بالإصابة بقرحة المعدة                |
| لا يوجد خطر الإدمان                           | لا يوجد خطر الإدمان                          | خطر ضئيل للإدمان                              |
| لا يوجد خطر تلف الكلى و الكبد                 | لا يوجد خطر تلف الكلى و الكبد                | خطر ضئيل لتلف الكلى و الكبد                   |
| لا يوجد خطر الإصابة بنوبة قلبية و سكتة دماغية | خطر مرتفع بالإصابة بنوبة قلبية و سكتة دماغية | لا يوجد خطر الإصابة بنوبة قلبية و سكتة دماغية |
| تغطية جزئية من جهة التأمين                    | تغطية كاملة من جهة التأمين                   | تغطية كاملة من جهة التأمين                    |
| <input type="radio"/>                         | <input type="radio"/>                        | <input type="radio"/>                         |

التالي

الرجوع

100% 0%

**Supplemental figure 17.** An example of the choice-task questions. The choice-task questions allow participants to choose their most preferred treatment option among multiple scenarios.

## Supplemental Material
